# Supplementary material for: Xaluritamig, a STEAP1 × CD3 XmAb 2+1 Immune Therapy for Metastatic Castration-Resistant Prostate Cancer: Results from Dose Exploration in a First-in-Human Study
Source: PubMed Central journal article supplement — Cancer Discov. 2023 Oct 20;14(1):76–89. doi: 10.1158/2159-8290.CD-23-0964 (PMC10784743; doi:10.1158/2159-8290.cd-23-0964), 2023-10-20
Supplement: cd-23-0964_supplementary_figure_s1_suppsf1.pdf [file cd-23-0964_supplementary_figure_s1_suppsf1.pdf]

**Supplementary Figure S1. Study schema for xaluritamig IV monotherapy dose exploration and expansion phases**

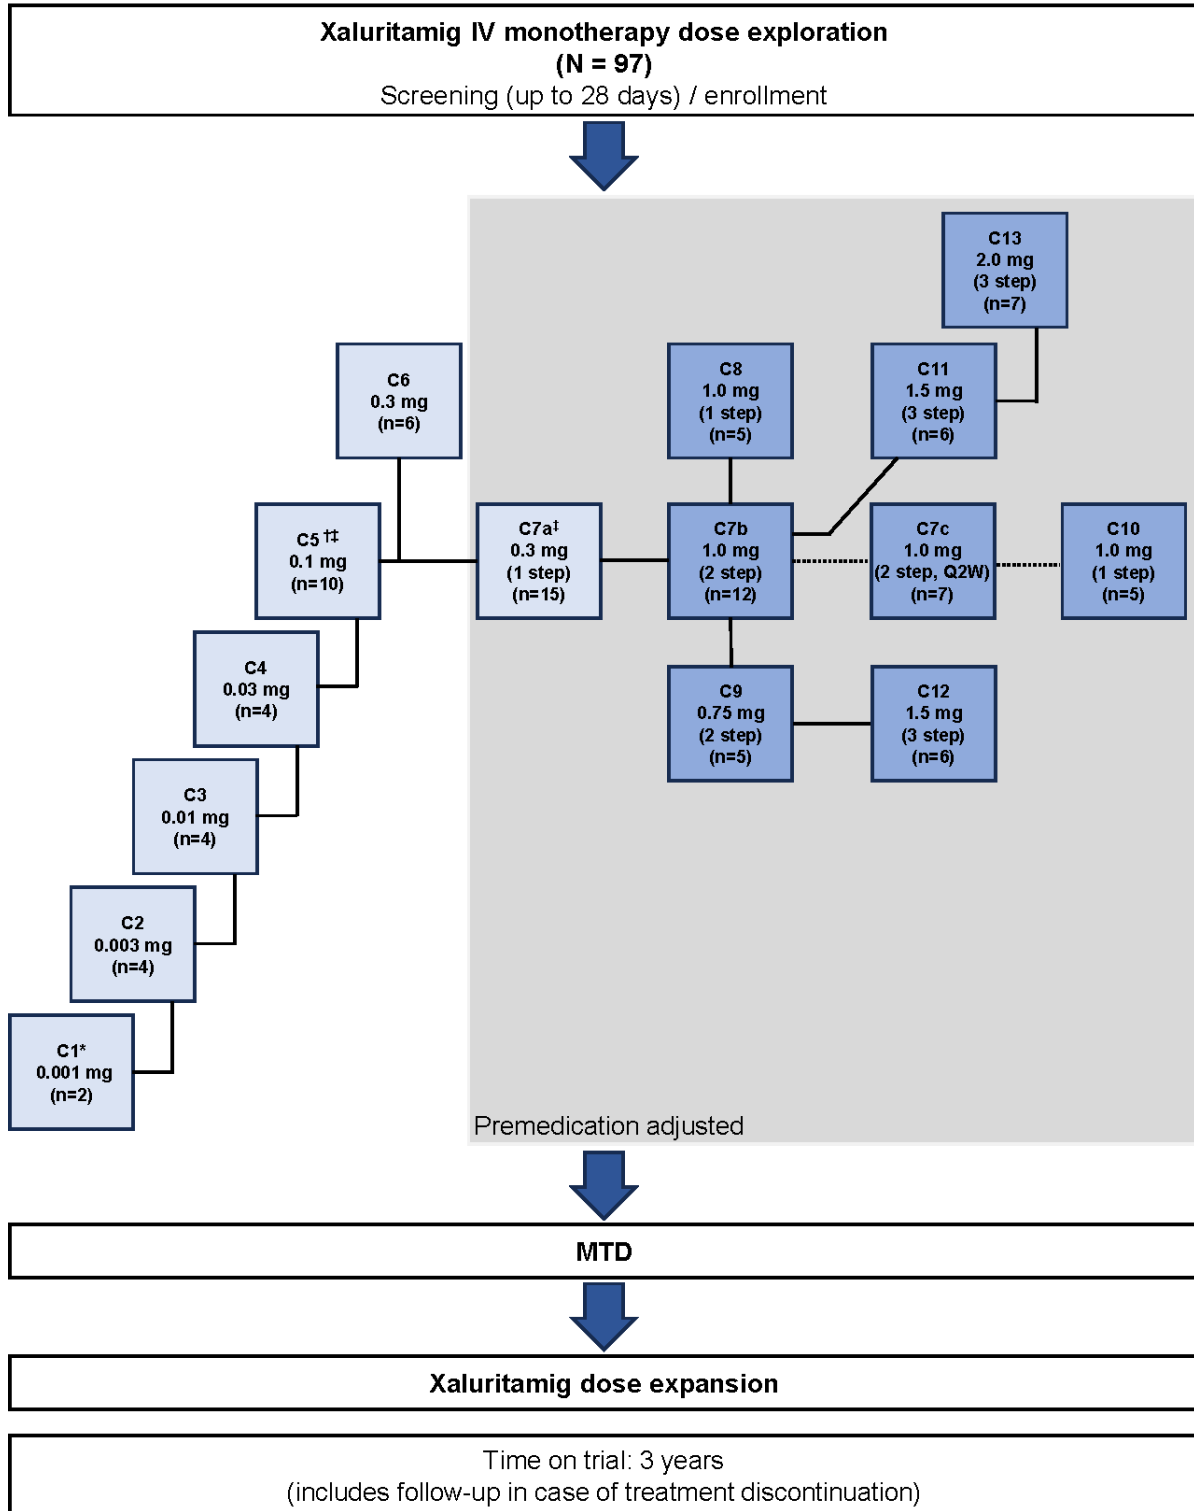

\*Dose escalation commenced at the MABEL-defined starting dose (0.001 mg in Cohort 1) and progressed according to the dosing schema .

†Step dosing was introduced following observation of CRS and PSA declines in Cohort 5 and was only tolerable upon adjustment of the premedication. The higher priming dose tested in Cohort 6 was not tolerable even when reassessed with adjusted premedication upon clearance of 1 mg target dose in Cycle 8.

‡Cohort backfilled after being declared safe.

C, cohort; CRS, cytokine release syndrome; IV, intravenous; MABEL, minimum anticipated biological effect level; MTD, maximum tolerated dose; PSA, prostate-specific antigen; Q2W, every 2 weeks.
