# Supplementary material for: Xaluritamig, a STEAP1 × CD3 XmAb 2+1 Immune Therapy for Metastatic Castration-Resistant Prostate Cancer: Results from Dose Exploration in a First-in-Human Study
Source: PubMed Central journal article supplement — Cancer Discov. 2023 Oct 20;14(1):76–89. doi: 10.1158/2159-8290.CD-23-0964 (PMC10784743; doi:10.1158/2159-8290.cd-23-0964), 2023-10-20
Supplement: cd-23-0964_supplementary_figure_s2_suppsf2.pdf [file cd-23-0964_supplementary_figure_s2_suppsf2.pdf]

Supplementary Figure S2. Time on treatment for patients in low-dose cohorts

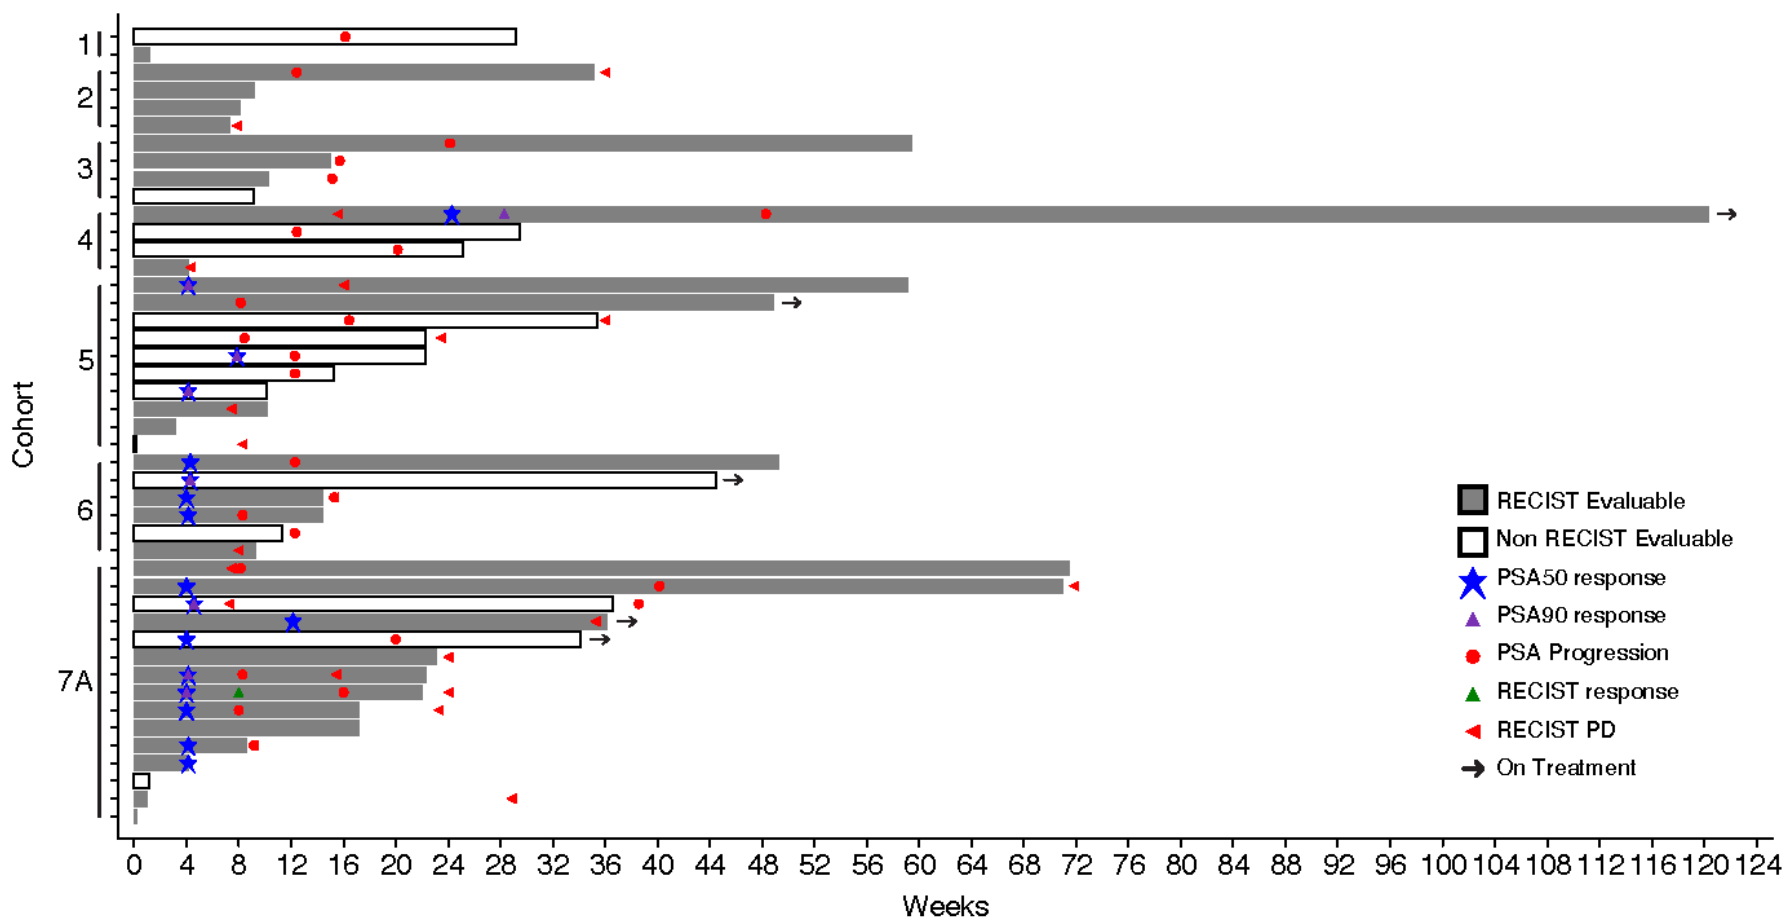

PSA and RECIST responses (RECIST evaluable [gray bars] and non-RECIST evaluable [white bars]) are presented for patients in low-dose cohorts. Patients whose treatment was ongoing are noted by an arrowhead.

PD, progressive disease; PSA, prostate-specific antigen; RECIST; Response Evaluation Criteria in Solid Tumors.
