# Supplementary material for: Xaluritamig, a STEAP1 × CD3 XmAb 2+1 Immune Therapy for Metastatic Castration-Resistant Prostate Cancer: Results from Dose Exploration in a First-in-Human Study
Source: PubMed Central journal article supplement — Cancer Discov. 2023 Oct 20;14(1):76–89. doi: 10.1158/2159-8290.CD-23-0964 (PMC10784743; doi:10.1158/2159-8290.cd-23-0964), 2023-10-20
Supplement: cd-23-0964_supplementary_table_s2_suppst2.pdf [file cd-23-0964_supplementary_table_s2_suppst2.pdf]

**Supplementary Table S2. ADA impact to landmark PSA50 response at 12 weeks**

|                      | <b>N<sup>†</sup></b> | <b>Reached 12 weeks<br/>time-on-treatment<sup>‡</sup><br/>(n)</b> | <b>PSA50 at 12 weeks<sup>§</sup><br/>n (%)</b> |
|----------------------|----------------------|-------------------------------------------------------------------|------------------------------------------------|
| <b>ADA-positive*</b> | 54                   | 39                                                                | 23 (59%)                                       |
| <b>ADA-negative</b>  | 36                   | 12                                                                | 7 (58%)                                        |

\*ADA-positive includes patients that developed ADAs at any time during this study.

<sup>†</sup>N includes 90 evaluable patients with both a baseline and post-baseline result.

<sup>‡</sup>The 12-week timepoint is determined by either 87 days after the first dose of xaluritamig, or the Cycle 4 D1 assessment, whichever is later.

<sup>§</sup>PSA50 at 12 weeks defined as achieving the PSA response (PSA 50) at or prior to 12 weeks after the first dose of xaluritamig.

ADA, antidrug antibodies; D, day; PSA, prostate-specific antigen.
